# Supplementary material
Source: HighWire-hosted journal article supplement (https://www.annfammed.org/highwire/filestream/26556/field_highwire_adjunct_files/0/PinotSuppFig.pdf)

**Supplemental materials for:**

**Relation Between Chest Radiography Results and Antibiotic Initiation in Community-Acquired Pneumonia Management by General Practitioners**

*Juliette Pinot, MD<sup>1,2</sup>*

*Serge Gilberg, MD<sup>2</sup>*

*Cédric Laouénan, MD, PhD<sup>1,3</sup>*

*Toni Alfaiate<sup>3</sup> Marie Ecollan, MD<sup>2</sup>*

*Fanny Cussac, MD<sup>2</sup>*

*Raphaël Pecqueur, MD<sup>2</sup>*

*Marie-Pierre Revel, MD, PhD<sup>4,5</sup>*

*Cyrille Vartanian, MD<sup>6</sup>*

*Henri Partouche, MD<sup>2</sup>*

*Xavier Duval, MD, PhD<sup>1,7\*</sup>*

*Josselin Le Bel, MD, PhD<sup>1,2\*</sup>*

<sup>1</sup>Université Paris Cité and Université Sorbonne Paris Nord, INSERM, IAME, Paris, France

<sup>2</sup>Université Paris Cité, Department of General Practice, Paris, France

<sup>3</sup>Département of Epidemiology Biostatistics and Clinical Research, AP-HP, Hôpital Bichat, Paris, France

<sup>4</sup>Department of Radiology, Cochin Hospital, AP-HP Centre, Paris, France

<sup>5</sup>Université Paris Cité, Paris, France

<sup>6</sup>Université de Nantes, Department of General Practice, Faculty of Medicine, Nantes, France

<sup>7</sup>AP-HP, Hôpital Bichat, Centre d'Investigation Clinique, INSERM CIC-1425, Paris, France

\*Equal participation

# Supplemental Figure. PneumoCAP study procedure.

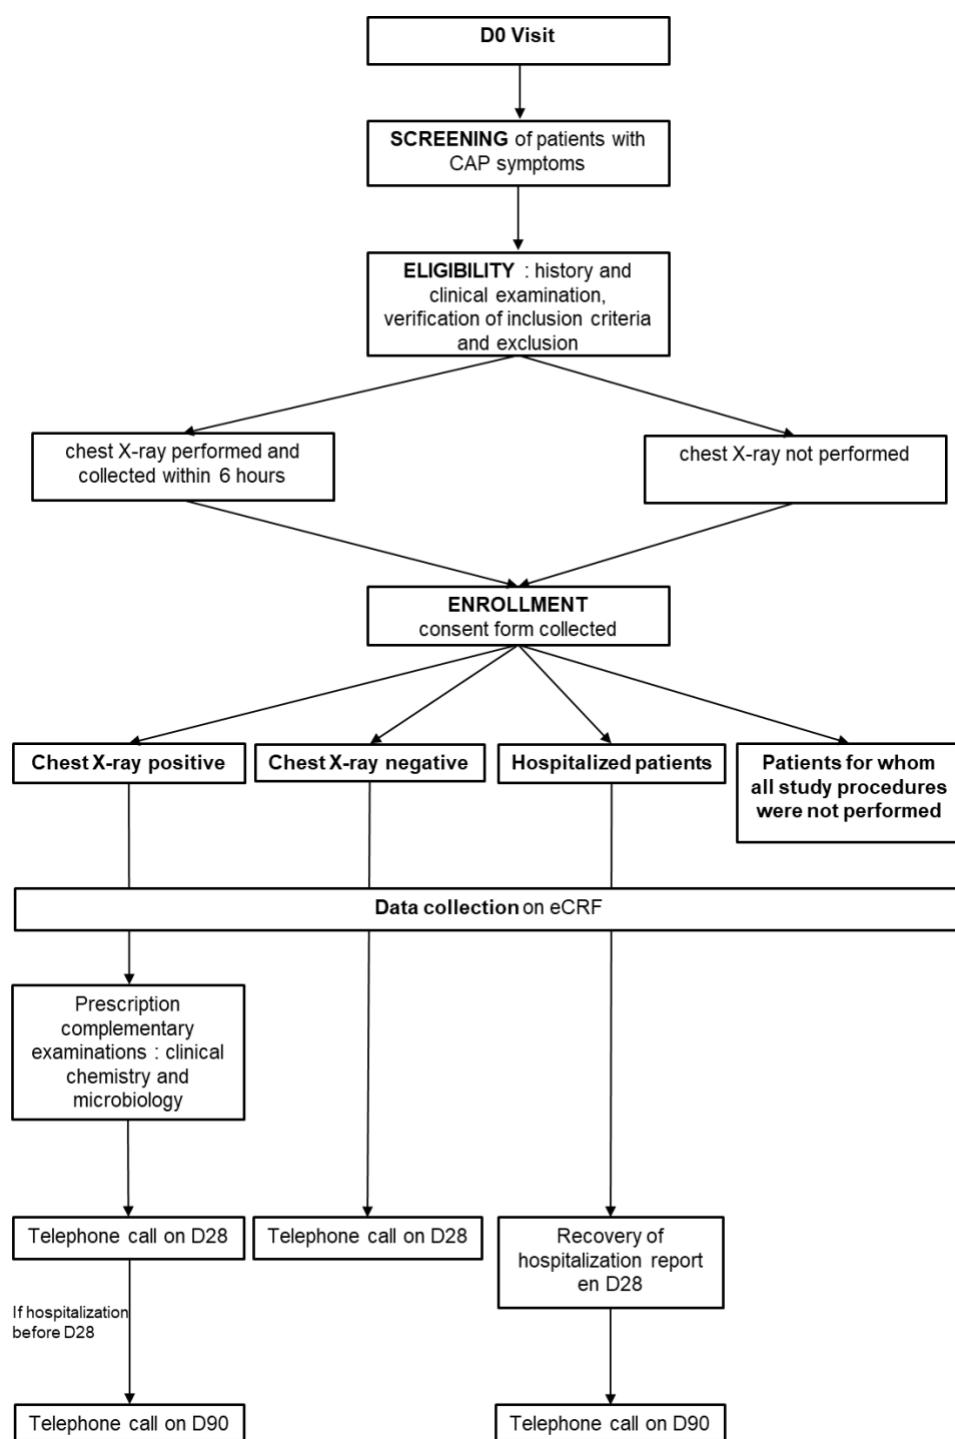

Supplement: PinotSuppFig.pdf [file PinotSuppFig.pdf]
